# Supplementary figures and images for: Adaptation after vastus lateralis denervation in rats demonstrates neural regulation of joint stresses and strains
Source: eLife journal article supplement (doi:10.7554/elife.38215), 2018-09-03

**a**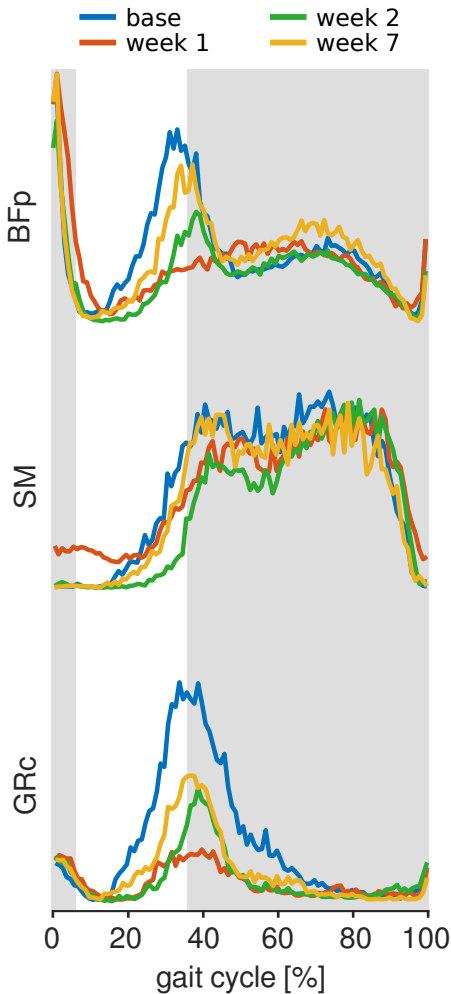**b**

integrated activity

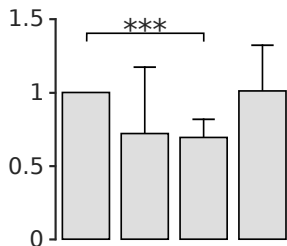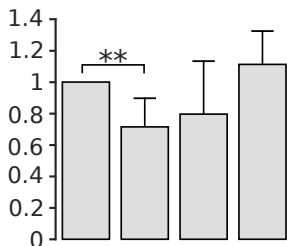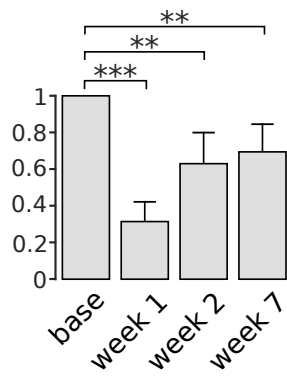

Supplement: supp [file elife-38215-supp-v1.zip]

**a**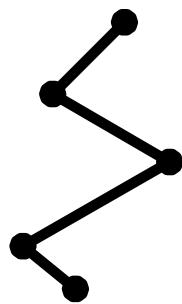

baseline

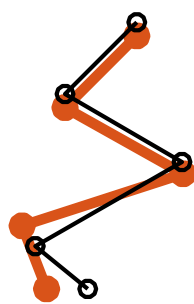

week 1

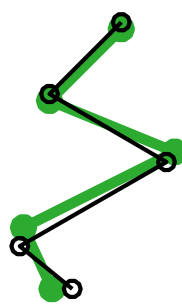

week 2

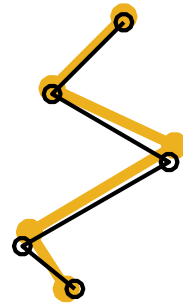

week 7

**b**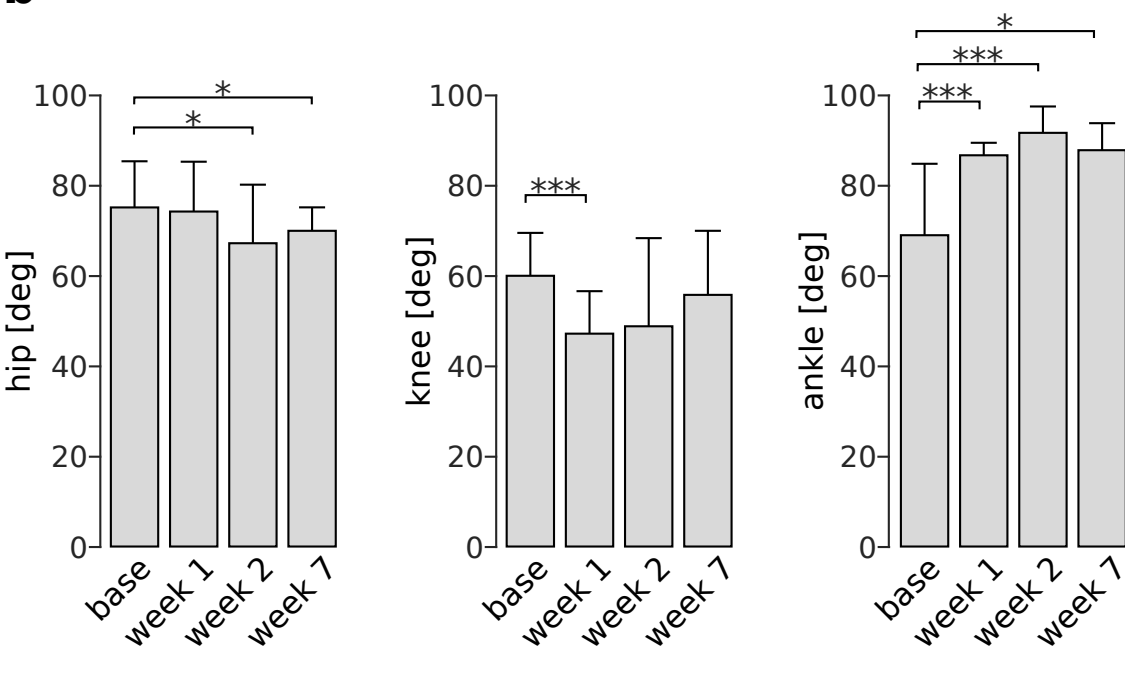**c**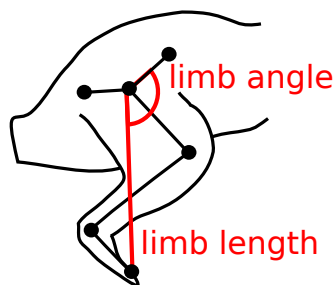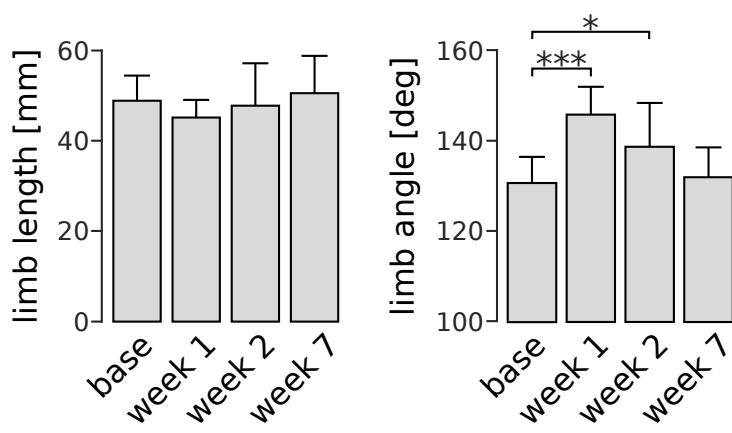

Supplement: supp [file elife-38215-supp-v1.zip]
